# Supplementary material
Source: publisher figshare collection journal article supplement (https://acs.figshare.com/ndownloader/files/21820314)
Supplement: Supplementary file 2 [file 21820314]

Archive with 4 entries (4 files):
- info.xml
- ao9b02862_high_quality.mp4
- 1700_Model_Release_Person_in_Photograph.pdf
- ao9b02862.pdf
