# Supplementary material
Source: publisher figshare collection journal article supplement (https://acs.figshare.com/ndownloader/files/21820314)
Supplement: Supplementary file 2 [file 21820314 › info.xml]

<presentation>
	<article>
		<title>V5+, Nb5+, Ta5+\) Crystals Doped with Tb3+ or Yb3+ Rare Earths Ions</title>
		<doi>10.1021/acsomega.9b02862</doi>
		<copyright>American Chemical Society</copyright>
		<narrator>Pablo Botella</narrator>
		<contact>Pablo Botella</contact>
		<contact-email>pablo.botella.vives@ltu.se</contact-email>
		<author-list>
			<author>Pablo Botella</author>
		</author-list>
	</article>
	<slides height-width-ratio=".75">
		<slide audio-time="27">
			<subtitle/>
		</slide>
		<slide audio-time="90">
			<subtitle/>
		</slide>
		<slide audio-time="50">
			<subtitle/>
		</slide>
		<slide audio-time="46">
			<subtitle/>
		</slide>
		<slide audio-time="94">
			<subtitle/>
		</slide>
		<slide audio-time="124">
			<subtitle/>
		</slide>
		<slide audio-time="81">
			<subtitle/>
		</slide>
		<slide audio-time="56">
			<subtitle/>
		</slide>
	</slides>
	<audio duration="568"/>
</presentation>
